# Supplementary material for: Nitrate enhances skeletal muscle fatty acid oxidation via a nitric oxide-cGMP-PPAR-mediated mechanism
Source: PubMed Central journal article supplement (PMC4688964; doi:10.1186/s12915-015-0221-6), 2015-12-22

A

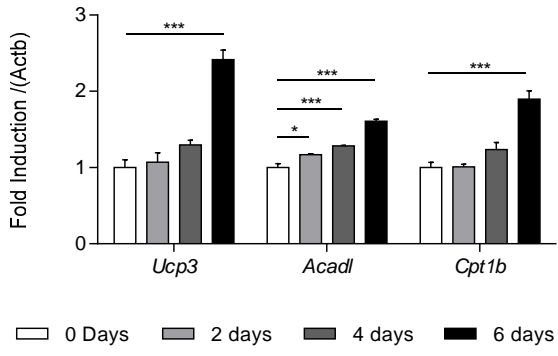

Supplement: 12915_2015_221_MOESM2_ESM.pdf [file 12915_2015_221_MOESM2_ESM.pdf]
