# Supplementary material for: Nitrate enhances skeletal muscle fatty acid oxidation via a nitric oxide-cGMP-PPAR-mediated mechanism
Source: BMC Biol. 2015 Dec 22;13:110. doi: 10.1186/s12915-015-0221-6 (PMC4688964; doi:10.1186/s12915-015-0221-6)
Supplement: Additional file 3: — Supporting data. (XLSX 45.3 kb) [file 12915_2015_221_MOESM3_ESM.xlsx]

## Sheet: Figure 1
	Panel	A				B								C								Da								Db				E				F				G
	Group	N/C	N/N	H/C	H/N	N/C	N/C	N/N	N/N	H/C	H/C	H/N	H/N	N/C	N/C	N/N	N/N	H/C	H/C	H/N	H/N	N/C	N/C	N/N	N/N	H/C	H/C	H/N	H/N	N/C	N/N	H/C	H/N	N/C	N/N	H/C	H/N	N/C	N/N	H/C	H/N	N/C	N/C	N/N	N/N	H/C	H/C	H/N	H/N
	Subgroup	NOx	NOx	NOx	NOx	<C16:0	≥C16:0	<C16:0	≥C16:0	<C16:0	≥C16:0	<C16:0	≥C16:0	Free Carn.	Acyl-Carn.	Free Carn.	Acyl-Carn.	Free Carn.	Acyl-Carn.	Free Carn.	Acyl-Carn.	LEAK	OXPHOS	LEAK	OXPHOS	LEAK	OXPHOS	LEAK	OXPHOS	RCR	RCR	RCR	RCR	Hoad	Hoad	Hoad	Hoad	Mal.-CoA	Mal.-CoA	Mal.-CoA	Mal.-CoA	CS	Pgc1α	CS	Pgc1α	CS	Pgc1α	CS	Pgc1α
	1	1.362	1.409	0.845	0.947	7.7665	27.6643	7.163	18.7491	4.6214	52.7367	5.3457	28.8724	42.1085	14.5771	42.8973	17.3608	20.2491	16.6754	36.9654	20.0169	7	9.8	6.4	15.3	5.67	7	6	16	1.4	2.39062	1.23529	2.66667	2.36107	3.27136	2.57316	2.4251	1.09738	0.407301	0.748084	0.305539	1.15614	0.847157	1.47222	1.21995	0.899875	0.585527	1.41471	1.01855
	2	1.002	1.276	0.934	1.027	8.4609	38.1549	8.76	15.9668	4.3506	47.2997	4.8178	23.6984	29.4404	16.0585	44.1614	16.9743	26.0432	15.9977	33.5632	17.4372	3.75	5.88	7.67	17.67	6.5	7.5	6.5	12.5	1.56667	2.30435	1.15385	1.92308	2.00272	3.14336	1.82716	2.6953	1.25571	0.439213	1.06651	0.21895	0.969069	1.30902	1.51486	1.13845	0.823422	0.367292	1.39029	0.872869
	3	1.182	1.352	0.889	0.982	7.3285	27.4639	6.1224	17.8046	4.4679	33.8605	4.5879	19.8287	30.0636	22.5877	40.4449	19.8486	19.3476	15.096	43.5854	17.7811	3.75	9.63	5.13	15	7.25	8.75	5.33	10.17	2.56667	2.92683	1.2069	1.90625	1.91486	2.97849	1.09734	2.38067	0.709477	0.350689	0.735244	0.538148	1.19405	1.01232	1.30301	1.54353	0.765422	0.537469	0.931833	1.14378
	4	-	0.957	0.789	0.92	6.9416	38.6793	6.3057	17.0278	6.8301	36.4898	7.5549	24.7474	26.8492	25.3368	74.9033	32.6098	25.5541	20.5319	37.0175	21.5846	2.5	4.17	6.86	11.43	3.25	3.75	7.75	8.25	1.66667	1.66667	1.15385	1.06452	1.70028	2.39571	1.91301	3.02976	0.937434	0.408267	1.032	-	0.757959	1.06465	1.45886	1.99052	0.790137	0.328284	0.569282	1.17786
	5	-	-	-	-	8.8048	39.589	7.8594	22.3356	4.6126	44.2874	7.6433	29.3241	25.5471	14.9156	36.5283	12.7739	25.4629	16.4034	44.6467	7.59281	5.57	10.57	6.13	12.25	10.67	11.67	8	12.5	1.89744	2	1.09375	1.5625	-	-	-	-	-	-	-	-	0.823105	0.205951	1.05406	1.39213	0.470193	0.219144	0.813741	0.715462
	6	-	-	-	-	7.4224	23.9173	6.203	25.4021	2.7498	41.8382	5.2041	34.0249	30.9579	28.3033	40.5569	18.5455	28.2144	12.9489	60.1194	21.658	2.75	4	7.43	13.29	3.6	4.6	7.8	14.2	1.45455	1.78846	1.27778	1.82051	-	-	-	-	-	-	-	-	1.04388	1.34335	1.11613	-	0.767578	0.353296	0.701748	0.286889
	7	-	-	-	-	6.9378	33.9148	6.5726	18.0101	5.1924	45.2709	4.0582	28.8429	23.5496	17.1239	34.9808	17.5022	38.8435	27.382	57.9404	20.9112	6.5	11.5	5.8	11.4	4	5	7	10.9	1.76923	1.96552	1.25	1.55714	-	-	-	-	-	-	-	-	1.0558	1.21755	-	-	-	-	-	-
	8	-	-	-	-	8.1141	29.9085	5.6999	17.2481	3.6671	38.3941	4.586	27.4882	27.6375	18.4123	43.4352	16.3446	22.5397	15.8096	39.0298	19.4456	3	4.8	5.38	10.5	1.4	2.4	7.5	10.99	1.6	1.95349	1.71429	1.46533	-	-	-	-	-	-	-	-	-	-	-	-	-	-	-	-
	9	-	-	-	-	7.6074	37.4414	8.0922	24.6838	5.7388	49.1925	4.3326	28.6204	24.9225	16.3472	39.8941	20.8996	33.4937	16.5496	29.1228	19.3202	4.14	3.29	7	12.8	2.2	5.4	6.33	14.33	0.793103	1.82857	2.45455	2.26316	-	-	-	-	-	-	-	-	-	-	-	-	-	-	-	-
	10	-	-	-	-	7.7696	25.5616	5.8766	21.0307	-	-	-	-	24.5995	17.8608	-	-	-	-	59.1655	25.6335	3.6	6.4	-	-	-	-	7.67	17	1.77778	-	-	2.21739	-	-	-	-	-	-	-	-	-	-	-	-	-	-	-	-
[truncated: 12 more columns]

## Sheet: Table 1
		Food Intake				Water Intake				Nitrate Intake				Body Weights
	Group	Control	Low	Medium	High	Control	Low	Medium	High	Control	Low	Medium	High	Control	Control	Low	Low	Medium	Medium	High	High
	Subgroup	Food	Food	Food	Food	Water	Water	Water	Water	Nitrate	Nitrate	Nitrate	Nitrate	Start	End	Start	End	Start	End	Start	End
	1	32.5	30	28	31.5	29.5	32	33	36	1.27353	4.06928	6.58916	13.2822	268	390	272	428	270	414	269	410
	2	32.5	30	28	31.5	29.5	32	33	36	1.20111	4.09309	6.58795	13.3713	260	402	269	405	257	395	267	420
	3	30	30	29	30	31.5	34	45	30	1.30523	4.05323	8.07061	10.3729	-	-	274	446	285	452	261	428
	4	30	30	-	30	31.5	34	-	30	1.17047	3.99744	-	12.0926	264	412	270	402	-	-	280	347
	5	29	30	30	29	30.5	38	34	30	1.15676	4.66141	6.38956	11.3146	267	415	255	442	266	416	277	415
	6	29	30	30	-	30.5	38	34	-	1.25946	4.57806	7.55085	-	264	409	268	394	270	398	-	-

## Sheet: Figure 2
	Panel	A								B								C				D				E				F				G				H
	Group	Control	Control	Low	Low	Medium	Medium	High	High	Control	Control	Low	Low	Medium	Medium	High	High	Control	Low	Medium	High	Control	Low	Medium	High	Control	Low	Medium	High	Control	Low	Medium	High	Control	Low	Medium	High	Control	Low	Medium	High
	Subgroup	<C16:0	≥C16:0	<C16:0	≥C16:0	<C16:0	≥C16:0	<C16:0	≥C16:0	LEAK	OXPHOS	LEAK	OXPHOS	LEAK	OXPHOS	LEAK	OXPHOS	CS	CS	CS	CS	Hoad	Hoad	Hoad	Hoad	Palmitate	Palmitate	Palmitate	Palmitate	Cpt1	Cpt1	Cpt1	Cpt1	Mal.-CoA	Mal.-CoA	Mal.-CoA	Mal.-CoA	Mcd	Mcd	Mcd	Mcd
	1	8.9181	38.1549	8.1695	32.2997	8.1012	22.4499	7.8594	12.5114	4.53	6.11	4.94	7.45	5.11	10.11	5.27	9.73	1.75731	1.80657	5.14442	12.7564	9.95809	13.9181	9.52711	15.7107	0.35473	0.2674	0.30227	0.85217	0.112765	1.2492	1.04919	1.21655	162.141	29.6379	40.8614	77.6298	1.3725	2.80527	3.62117	2.38834
	2	9.3339	38.6793	8.5624	28.4548	7.8178	21.6923	7.5726	13.0101	3.58	4.94	4.18	6.82	5.92	10.8	5.24	9.33	6.24207	4.54608	4.1121	15.565	7.07821	3.72693	11.3653	22.1705	0.18936	0.17802	0.46479	0.59538	0.77246	1.02371	1.13135	0.814486	185.863	60.4945	34.2469	45.009	1.17059	2.76553	2.6525	1.65012
	3	9.8288	32.589	9.6613	23.6462	7.5879	13.8287	7.6999	13.6295	3.61	5.78	4.8	7.2	5.13	11.5	5.5	10.63	2.07285	2.71777	1.76846	14.6514	3.1052	4.54695	6.30372	4.40947	0.25009	0.46241	0.31065	0.34405	0.411302	1.64745	1.36134	1.14284	104.537	70.2789	39.0047	49.9178	1.31279	4.38233	3.03374	2.70299
	4	8.2029	34.2024	9.9671	31.8382	8.5549	30.4162	8.1655	23.8578	3.83	6.33	5.25	7.75	5.67	10.56	7.25	12.5	6.0181	3.23923	4.95505	11.2931	10.2233	8.38833	3.62305	18.6027	0.32648	0.16687	0.33566	0.22391	0.987262	1.07754	1.22374	0.987925	166.792	33.9645	41.2065	82.9798	0.962953	1.44995	1.78202	1.62003
	5	8.8407	37.4414	9.7917	22.4442	8.6433	16.515	8.8766	18.2446	4.14	7	3.67	6.17	5.5	10	5.57	9.14	4.63725	10.2813	3.30715	4.62346	9.86687	9.40383	7.46776	-	0.16927	0.17323	0.37422	0.2848	0.632217	1.01853	0.694901	0.899066	108.128	32.6334	73.6429	-	0.64636	1.73004	1.59495	1.61184
	6	8.1294	33.9724	7.6671	25.3941	8.2041	23.0249	-	-	4.88	7.18	4.13	7.5	5.56	11.33	-	-	3.26534	5.0566	12.735	-	8.92741	7.53027	3.13554	-	0.12557	0.25163	0.374	0.80592	0.116409	1.18503	1.1009	0.997639	242.943	-	-	-	0.534806	1.5667	1.46392	-

## Sheet: Figure 3
	Panel	A								B								C								Da								Db				Ea				Eb
	Group	Control	Control	Low	Low	Medium	Medium	High	High	Control	Control	Low	Low	Medium	Medium	High	High	Control	Control	Low	Low	Medium	Medium	High	High	WT/C	WT/C	WT/N	WT/N	KO/C	KO/C	KO/N	KO/N	WT/C	WT/N	KO/C	KO/N	WT/C	WT/C	WT/N	WT/N	KO/C	KO/N
	Subgroup	cGMP	cAMP	cGMP	cAMP	cGMP	cAMP	cGMP	cAMP	Pparα	Pparβ/δ	Pparα	Pparβ/δ	Pparα	Pparβ/δ	Pparα	Pparβ/δ	Pparα	Pparβ/δ	Pparα	Pparβ/δ	Pparα	Pparβ/δ	Pparα	Pparβ/δ	LEAK	OXPHOS	LEAK	OXPHOS	LEAK	OXPHOS	LEAK	OXPHOS	RCR	RCR	RCR	RCR	Pparα	Pparβ/δ	Pparα	Pparβ/δ	Pparβ/δ	Pparβ/δ
	1	155.439	13.2537	302.915	17.6839	191.548	15.6333	373.692	10.9695	1.10845	1.06683	0.941636	1.65681	1.37258	1.75397	2.00877	1.06601	1.01863	1.18297	8.07453	138.486	51.5528	74.1325	41.6149	10.7256	6.84	14.32	8.42	24.21	3.12	10.12	3.8	16	2.09357	2.8753	3.24359	2.98421	0.996852	0.643709	0.643709	0.979763	0.947447	1.13122
	2	193.777	14.5985	170.007	16.8924	360.075	13.956	285.316	18.3414	1.05301	0.865172	1.27311	1.39534	1.64276	1.74594	1.99286	1.26409	1.06832	0.993691	15.528	124.29	39.1304	92.1136	37.8882	20.1893	8.25	15.5	6.2	22.14	4.21	10.4	5.7	12.5	1.87879	3.57097	2.47031	1.91228	0.862191	1.21491	1.21491	1.0552	1.09828	1.25321
	3	83.3615	15.142	222.637	18.9956	264.181	15.2336	289.703	19.4424	0.838542	1.06799	0.996831	2.09263	1.72519	1.44206	1.7929	1.31547	0.931677	0.955836	3.10559	65.6151	45.3416	54.2587	59.0062	16.4038	7.14	13.34	9.87	30.14	5.5	11.25	4.51	10.17	1.86835	3.0537	2.04545	2.76718	1.08862	1.15738	1.15738	1.02875	1.31091	0.768039
	4	197.512	15.6618	309.503	11.6641	327.908	20.2996	277.718	10.574	-	-	-	-	-	-	-	-	0.956522	0.917981	31.677	160.252	21.7391	26.8139	27.9503	31.5457	8.71	17.34	7.09	21.23	5	15.22	5.74	8.25	1.99082	2.99436	3.044	2.6324	0.733861	1.11424	1.11424	1.10713	0.726501	0.809769
	5	82.4667	16.0281	250.543	17.7773	217.028	17.8245	-	-	-	-	-	-	-	-	-	-	1.01863	0.936909	40.3727	86.4353	19.2547	35.3312	29.1926	23.9748	5.01	18.32	5.54	23.3	6.43	18.11	5.12	12.5	3.65669	4.20578	2.81649	2.22656	1.12876	1.00685	1.00685	0.881786	0.960174	1.02006
	6	202.525	13.4752	-	-	-	-	-	-	-	-	-	-	-	-	-	-	1.00621	1.01262	9.31677	175.394	22.9814	96.8454	-	-	7.21	19.34	4.1	17.4	7.98	14.14	5.15	14.2	2.68239	4.2439	1.77193	3.57282	1.18971	1.10573	1.10573	1.04835	0.956685	0.756326
	7	-	-	-	-	-	-	-	-	-	-	-	-	-	-	-	-	-	-	-	-	-	-	-	-	5.12	14.94	7.4	25.8	4.4	13.03	7.11	10.9	2.91797	3.48649	2.96136	2.87623	-	-	-	-	-	-
	8	-	-	-	-	-	-	-	-	-	-	-	-	-	-	-	-	-	-	-	-	-	-	-	-	9.04	19.4	7.1	18.7	4.12	10.34	4.92	10.99	2.14602	2.6338	2.50971	2.49593	-	-	-	-	-	-

## Sheet: Figure 4
	Panel	A									B									C						D						E						F
	Group	0 Days	0 Days	0 Days	2 Days	2 Days	2 Days	4 Days	4 Days	4 Days	Control	Control	Control	50N	50N	50N	500N	500N	500N	Control	C+sGCi	C+PKGi	50N	50N+sGCi	50N+PKGi	Control	C+sGCi	C+PKGi	500N	500N+sGCi	500N+PKGi	Control	C+sGCi	C+PKGi	50N	50N+sGCi	50N+PKGi	Control	C+sGCi	C+PKGi	500N	500N+sGCi	500N+PKGi
	Subgroup	Myod	Tnni1	Tnni2	Myod	Tnni1	Tnni2	Myod	Tnni1	Tnni2	Myod	Tnni1	Tnni2	Myod	Tnni1	Tnni2	Myod	Tnni1	Tnni2	LEAK	LEAK	LEAK	LEAK	LEAK	LEAK	LEAK	LEAK	LEAK	LEAK	LEAK	LEAK	OXPHOS	OXPHOS	OXPHOS	OXPHOS	OXPHOS	OXPHOS	OXPHOS	OXPHOS	OXPHOS	OXPHOS	OXPHOS	OXPHOS
	1	0.913665	0.874436	0.789674	3.52191	0.929073	2.76894	3.14548	1.77553	2.84261	1.05484	0.809584	0.540886	0.983434	1.12921	1.08817	1.06057	1.16137	0.994624	2.72825	2.65164	2.43874	3.34103	3.22356	2.41796	2.72825	2.65164	2.43874	4.90995	3.21507	2.7999	12.472	10.6066	9.37976	14.0675	12.2273	10.3627	12.472	10.6066	9.37976	15.2933	10.1045	11.5858
	2	0.931169	0.955435	0.788879	2.25897	1.06749	1.65865	3.65439	3.86282	4.80609	0.825163	0.918787	0.991729	1.39697	1.13947	1.01103	1.02916	1.17466	0.999721	3.3224	2.70813	2.33829	2.83933	2.88241	2.58498	3.3224	2.70813	2.33829	6.00355	2.93544	2.40407	13.9891	11.0018	11.1831	12.2782	10.4815	11.3739	13.9891	11.0018	11.1831	17.4649	10.0906	10.1711
	3	1.06974	0.980649	0.930706	2.08748	1.2116	1.05787	2.36745	3.34361	3.44856	1.28031	1.24636	1.30771	1.01802	1.08948	0.954281	0.866366	1.07768	1.02755	3.78327	2.59795	2.49501	2.79965	2.57183	2.53041	3.78327	2.59795	2.49501	4.6426	2.71019	2.55836	12.9712	10.0566	10.978	11.6652	8.84067	10.7056	12.9712	10.0566	10.978	16.9851	10.6765	8.52787
	4	1.08543	1.18948	1.49074	1.4983	0.94948	1.31452	1.1419	1.59764	1.87833	0.839686	1.02527	1.15968	0.871745	1.0804	1.14628	1.03429	0.863482	1.11847	2.62346	2.53137	1.96681	3.34433	2.6004	2.50663	2.62346	2.53137	1.96681	4.70934	2.80899	2.52987	12.3457	9.60175	9.83405	12.3212	10.9049	9.64088	12.3457	9.60175	9.83405	16.4827	9.3633	8.99508

## Sheet: Figure 5
	Panel	A									B									C									D									E									F
	Group	Control	Control	Control	50N	50N	50N	500N	500N	500N	Control	Control	Control	50N	50N	50N	500N	500N	500N	C+sGCi	C+sGCi	C+sGCi	50N+sGCi	50N+sGCi	50N+sGCi	500N+sGCi	500N+sGCi	500N+sGCi	C+sGCi	C+sGCi	C+sGCi	50N+sGCi	50N+sGCi	50N+sGCi	500N+sGCi	500N+sGCi	500N+sGCi	C+PKGi	C+PKGi	C+PKGi	50N+PKGi	50N+PKGi	50N+PKGi	500N+PKGi	500N+PKGi	500N+PKGi	C+PKGi	C+PKGi	C+PKGi
	Subgroup	Cpt1b	Acadl	Hadh	Cpt1b	Acadl	Hadh	Cpt1b	Acadl	Hadh	Ucp3	Cycs	Ndufs1	Ucp3	Cycs	Ndufs1	Ucp3	Cycs	Ndufs1	Cpt1b	Acadl	Hadh	Cpt1b	Acadl	Hadh	Cpt1b	Acadl	Hadh	Ucp3	Cycs	Ndufs1	Ucp3	Cycs	Ndufs1	Ucp3	Cycs	Ndufs1	Cpt1b	Acadl	Hadh	Cpt1b	Acadl	Hadh	Cpt1b	Acadl	Hadh	Ucp3	Cycs	Ndufs1
	1	0.888511	0.860681	0.849731	1.15491	1.3058	1.27727	2.23208	2.10226	2.14761	0.926984	0.752993	0.888989	1.25099	1.33139	1.671	3.25172	1.60442	2.29538	0.854671	0.876693	0.930998	1.03528	1.10336	0.971494	0.895737	1.20913	0.998551	0.798137	0.949873	0.912896	1.07317	0.993867	1.03084	0.989622	1.1479	1.11356	0.819347	0.895099	0.839917	1.00531	1.01358	1.08067	0.930281	1.01718	1.03953	0.8826	0.775733	0.872393
	2	1.0325	1.01267	1.04761	1.19524	2.00538	1.52112	2.09884	1.97636	1.88502	0.961433	1.03996	0.959131	0.988153	2.06169	1.38427	2.02228	1.52727	1.74357	0.912822	0.935622	0.81747	0.929184	1.02583	1.18281	1.37375	1.00101	1.1823	0.842859	0.896544	0.891742	1.01151	1.12326	1.03965	1.03292	1.04729	1.0688	1.08455	1.02701	1.08107	1.15054	1.10953	1.11702	1.1059	0.926889	0.989739	1.16197	1.01669	1.04072
	3	1.16283	1.19303	1.16355	1.11836	1.12437	1.06715	2.2748	2.09313	2.07939	1.2036	1.20429	1.12718	1.39596	1.39502	1.60726	2.87313	1.771	1.20937	1.21575	1.1562	1.19311	1.04166	1.14491	1.1248	0.895217	0.847271	1.08078	1.22716	1.16501	1.1756	1.01401	1.12849	1.07226	1.05515	0.996512	1.02463	1.10529	0.965505	1.0697	1.2584	1.16231	1.1147	0.891076	0.967079	1.01162	0.953885	1.0455	1.03488
	4	0.916159	0.933618	0.939103	1.34515	1.07795	1.15757	1.89675	2.22365	1.43328	0.907979	1.00275	1.0247	1.40342	1.06452	1.57936	1.99464	3.07564	1.76431	1.01676	1.03149	1.05842	1.00575	1.22318	1.08101	1.0122	1.00035	1.11803	1.13184	0.988576	1.01976	1.25326	1.06692	1.2021	1.04175	1.02375	1.12763	0.99081	1.11238	1.00931	0.877993	0.931493	0.894104	0.84566	0.934408	0.876625	1.00154	1.16209	1.05201
[truncated: 6 more columns]

## Sheet: Figure 6
	Panel	A												B
	Group	Control	Control	Control	500N	500N	500N	1S	1S	1S	500+1	500+1	500+1	Control	Control	Control	500N	500N	500N	1S	1S	1S	500N+1S	500N+1S	500N+1S	1O	1O	1O	500N+1O	500N+1O	500N+1O
	Subgroup	Ucp3	Acadl	Cpt1b	Ucp3	Acadl	Cpt1b	Ucp3	Acadl	Cpt1b	Ucp3	Acadl	Cpt1b	Cpt1b	Cpt1b	Cpt1b	Cpt1b	Cpt1b	Cpt1b	Cpt1b	Cpt1b	Cpt1b	Cpt1b	Cpt1b	Cpt1b	Cpt1b	Cpt1b	Cpt1b	Cpt1b	Cpt1b	Cpt1b
	1	1.1702	1.04934	1.26095	2.26168	1.82023	2.17171	2.78559	1.98428	1.97764	4.03949	3.42088	4.39208	186.402	156.878	158.545	257.028	303.254	264.975	257.756	225.938	231.181	296.904	407.076	371.82	216.827	153.651	148.094	150.006	171.879	141.266
	2	0.946318	0.823635	0.975738	2.74872	1.96335	1.93176	2.67276	2.15493	3.12728	7.32829	4.28777	3.48047	-	-	-	-	-	-	-	-	-	-	-	-	-	-	-	-	-	-
	3	0.883484	1.12702	0.763316	2.44582	2.03901	1.96471	2.33577	1.94449	1.76922	5.80966	5.27876	5.30523	-	-	-	-	-	-	-	-	-	-	-	-	-	-	-	-	-	-

## Sheet: Figure S1
	Panel	A									B
	Group	C+sGCi	C+sGCi	C+sGCi	50N+sGCi	50N+sGCi	50N+sGCi	500N+sGCi	500N+sGCi	500N+sGCi	C+PKGi	C+PKGi	C+PKGi	50N+PKGi	50N+PKGi	50N+PKGi	500N+PKGi	500N+PKGi	500N+PKGi
	Subgroup	Myod	Tnni1	Tnni2	Myod	Tnni1	Tnni2	Myod	Tnni1	Tnni2	Myod	Tnni1	Tnni2	Myod	Tnni1	Tnni2	Myod	Tnni1	Tnni2
	1	0.865284	0.811068	0.757114	1.13346	0.942517	0.996851	1.13419	1.03988	0.934963	0.825461	0.882592	0.887492	1.20205	1.10386	1.09911	1.19509	1.13863	1.06604
	2	0.93761	0.967699	1.0236	1.11065	0.92589	0.968977	1.02542	0.885455	0.958241	0.914379	1.00176	0.932244	1.18293	1.17707	1.15846	1.2045	0.971426	1.20654
	3	1.14168	1.1145	1.15531	1.14162	0.981447	0.871113	0.952461	0.972219	0.856017	1.03009	1.07957	1.13972	0.876597	0.967602	1.0191	0.863052	1.15536	0.967077
	4	1.05543	1.10673	1.06398	1.11017	1.07874	1.04723	1.09642	1.00433	0.893617	1.23007	1.03608	1.04055	1.03619	1.00493	0.989851	1.02305	1.03073	1.04472

## Sheet: Figure S2
	Panel	A	A	A	A	A	A	A	A	A	A	A	A
	Group	Control	Control	Control	2 Days	2 Days	2 Days	4 Days	4 Days	4 Days	6 Days	6 Days	6 Days
	Subgroup	Ucp3	Acadl	Cpt1b	Ucp3	Acadl	Cpt1b	Ucp3	Acadl	Cpt1b	Ucp3	Acadl	Cpt1b
	1	0.794618	0.898232	1.12091	0.865544	1.14073	1.01758	1.20156	1.29554	1.12129	2.22997	1.66012	1.89774
	2	1.10449	1.04089	0.989132	1.05674	1.18562	0.9529	1.40762	1.27378	1.41953	2.36567	1.57672	1.70345
	3	1.10089	1.06088	0.889954	1.28761	1.17773	1.0588	1.27501	1.2752	1.15864	2.64694	1.58236	2.08117
